# Supplementary material
Source: PubMed Central journal article supplement (PMC8717574)
Supplement: mmc3.pdf [file mmc3.pdf]

As individuals cited in the Acknowledgements of the manuscript (**Human mesenchymal stem cells treatment for severe COVID-19: 1-year follow-up results of a randomized, double-blind, placebo-controlled trial, EBIOM-D-21-02269**), we agree with: the plan to submit to *EBioMedicine*; the contents of the manuscript; the statements on data access; to being listed in the Acknowledgements; and to the conflicts of interest statement as summarised.

|                 |                |
|-----------------|----------------|
| Xiaoqing Jiang  | Xuechun Lu     |
| Fang Lian       | Baojiang Fu    |
| Yan Zhang       | Yingying Gao   |
| Guanzhen Wang   | Hongbin Pu     |
| Junli He        | Guiyue Shen    |
| Chen Yao        | Xinyuan Tong   |
| Xiaoyan Yan     | Yongpei Yu     |
| Zhe Cao         | Yuanfa Cai     |
| Jian zeng Zhang | Mengmeng Zhong |
| Lu Shuai Huang  | Yongbing Huang |
| Tengyun Dong    | Haike Dong     |
| Lulu Zhao       |                |
|                 |                |
|                 |                |
|                 |                |
